## AS-amyloidosis. Dual pathology or novel disease? A multimodality, multi-centre assessment across health and disease

Patel K.<sup>1</sup>; Scully P.<sup>1</sup>; Nitsche C.<sup>2</sup>; Williams S.<sup>3</sup>; Tillin T.<sup>3</sup>; Captur G.<sup>3</sup>; Chako L.<sup>3</sup>; Newton J.<sup>4</sup>; Kennon S.<sup>1</sup>; Menezes L.<sup>1</sup>; Pugliese F.<sup>1</sup>; Fontana M.<sup>3</sup>; Treibel TA.<sup>1</sup>; Mascherbauer J.<sup>2</sup>; Moon JC.<sup>1</sup>

<sup>1</sup>St Bartholomew's Hospital, London, United Kingdom of Great Britain & Northern Ireland

<sup>2</sup>Medical University of Vienna, Department of Cardiology, Vienna, Austria

<sup>3</sup>University College London, London, United Kingdom of Great Britain & Northern Ireland

<sup>4</sup>John Radcliffe Hospital, Oxford, United Kingdom of Great Britain & Northern Ireland

**Funding Acknowledgements:** Type of funding sources: Foundation. Main funding source(s): British Heart Foundation

**onbehalf:** AS-Amyloidosis consortium

**Background:** The coexistence of severe aortic stenosis (lone AS) and transthyretin cardiac amyloidosis (lone amyloidosis) is common, but the resultant AS-amyloidosis phenotype is unclear.

**Purpose:** We characterised AS-amyloidosis, hypothesizing that the dual insult of AS-amyloidosis results in a severe phenotype.

**Methods:** We compared four cohorts with deep phenotyping: 81 older age controls, 359 lone AS, 36 AS-amyloidosis (Perugini grade 2 and 3) and 107 lone amyloidosis (Perugini grade 2 and 3).

**Results:** AS-amyloidosis was similar to lone AS with respect to left ventricular mass and LVEF (57 (45, 64)%). It was similar to lone amyloidosis with respect to lateral S" (0.04 (0.03, 0.06) m/s), NT-proBNP (4149 (1449, 6459) ng/L) and troponin T (56 (34, 100) ng/L). Whilst, prevalence of carpal tunnel syndrome (CTS) (17%) and diastolic function (E/A ratio 1.1 (0.8, 2.8)) were intermediate.

**Conclusion:** AS-amyloidosis is not a double insult from AS and amyloidosis, but a mixed phenotype with features similar to lone amyloidosis (cardiac biomarkers), lone AS (remodelling and LVEF) or intermediate (diastology and CTS).

Characteristics across all 4 groups

| Variable                            | Older age controls (n = 81) | Lone AS (n = 359)   | AS-amyloidosis (n = 36) | Lone amyloidosis (n = 107) | P value |
|-------------------------------------|-----------------------------|---------------------|-------------------------|----------------------------|---------|
| Age (years)                         | 82 (80, 84)*†‡              | 85 (80, 88)§∞       | 88 (85, 92)#            | 80 (75, 84)                | <0.005  |
| Sex (% male)                        | 69 *‡                       | 49 ∞                | 61 #                    | 94                         | <0.005  |
| Carpal tunnel syndrome (%)          | 0                           | 2 §                 | 17 #                    | 38                         | <0.005  |
| Voltage/mass ratio                  | 0.22 (0.14, 0.27)†‡         | 0.18 (0.13, 0.28)∞  | 0.18 (0.09, 0.21)#      | 0.07 (0.05, 0.10)          | <0.005  |
| NT-ProBNP (ng/L)                    | 131 (66, 221)*†‡            | 1629 (639, 3941)§∞  | 4149 (1449, 6459)       | 2888 (1755, 5483)          | <0.005  |
| hsTnT (ng/L)                        | 12 (8, 17)*†‡               | 24 (15, 40)§∞       | 56 (34, 100)            | 62 (41, 82)                | <0.005  |
| Inferolateral wall thickness (cm)   | 0.9 (0.8, 1.0)*†‡           | 1.1 (0.9, 1.3)∞     | 1.3 (1.1, 1.5)#         | 1.7 (1.6, 1.9)             | <0.005  |
| Anteroseptal wall thickness (cm)    | 1.0 (0.9, 1.2)*†‡           | 1.4 (1.2, 1.6)§∞    | 1.5 (1.3, 1.8)          | 1.7 (1.6, 1.9)             | <0.005  |
| Indexed LV mass (g/m <sup>2</sup> ) | 79 (66, 102)*†‡             | 128 (99, 152)∞      | 126 (116, 140)#         | 174 (159, 200)             | <0.005  |
| LVEF (%)                            | 59 (54, 63)†‡               | 59 (50, 65)∞        | 57 (45, 64)#            | 39 (31, 48)                | <0.005  |
| Lateral S" (m/s)                    | 0.08 (0.07, 0.09)*†‡        | 0.07 (0.05, 0.08)§∞ | 0.05 (0.04, 0.07)       | 0.05 (0.04, 0.06)          | <0.005  |
| Septal S" (m/s)                     | 0.06 (0.06, 0.08)*†‡        | 0.05 (0.04, 0.06)∞  | 0.04 (0.03, 0.06)       | 0.04 (0.03, 0.05)          | <0.005  |
| E/A                                 | 0.7 (0.6, 0.8)*†‡           | 0.8 (0.7, 1.3)§∞    | 1.1 (0.8, 2.8)#         | 2.4 (1.8, 3.3)             | <0.005  |
| RV Wall thickness (cm)              | 0.4 (0.3, 0.4)*†‡           | 0.4 (0.4, 0.6)∞     | 0.6 (0.4, 0.7)#         | 0.8 (0.7, 1.0)             | <0.005  |
| TAPSE (cm)                          | 2.4 (2.0, 2.7)*†‡           | 2.1 (1.6, 2.5)∞     | 1.9 (1.5, 2.1)#         | 1.4 (1.2, 1.9)             | <0.005  |
| Classical LFLG AS (%)               |                             | 9                   | 13                      |                            | 0.472   |

\* p < 0.05, Old age control vs Lone AS† p < 0.05, Old age control vs AS-amyloidosis‡ p < 0.05, Old age control vs Lone amyloidosis§ p < 0.05, Lone AS vs AS-amyloidosis∞ p < 0.05, Lone AS vs Lone amyloidosis# p < 0.05, AS-amyloidosis vs Lone amyloidosis

Abstract Figure. AS-amyloidosis compared to other cohorts

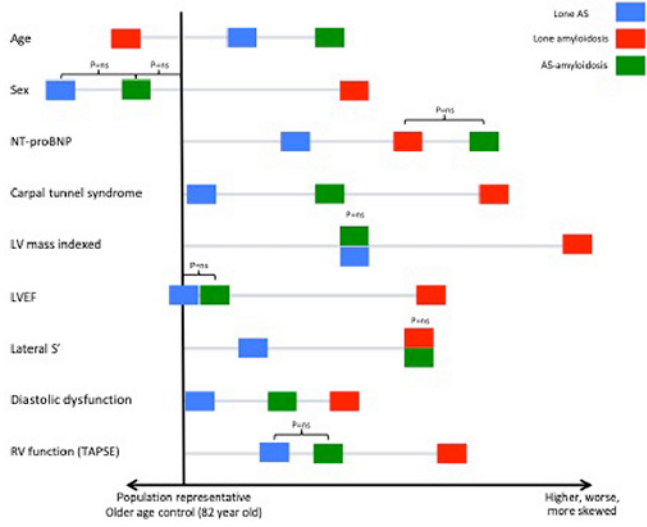

Source: http://academic.oup.com/ehjcimaging/article-pdf/22/Supplement_1/jeaa356.392/36214605/jeaa356.392.pdf
